# Supplementary material for: Angiotensin type-1 receptor and ACE2 autoantibodies in Parkinson´s disease
Source: PubMed Central journal article supplement (PMC9198025; doi:10.1038/s41531-022-00340-9), 2022-06-14
Supplement: 41531_2022_340_MOESM1_ESM.pdf [file 41531_2022_340_MOESM1_ESM.pdf]

## Analysis excluding controls and patients under immunosuppressive treatment

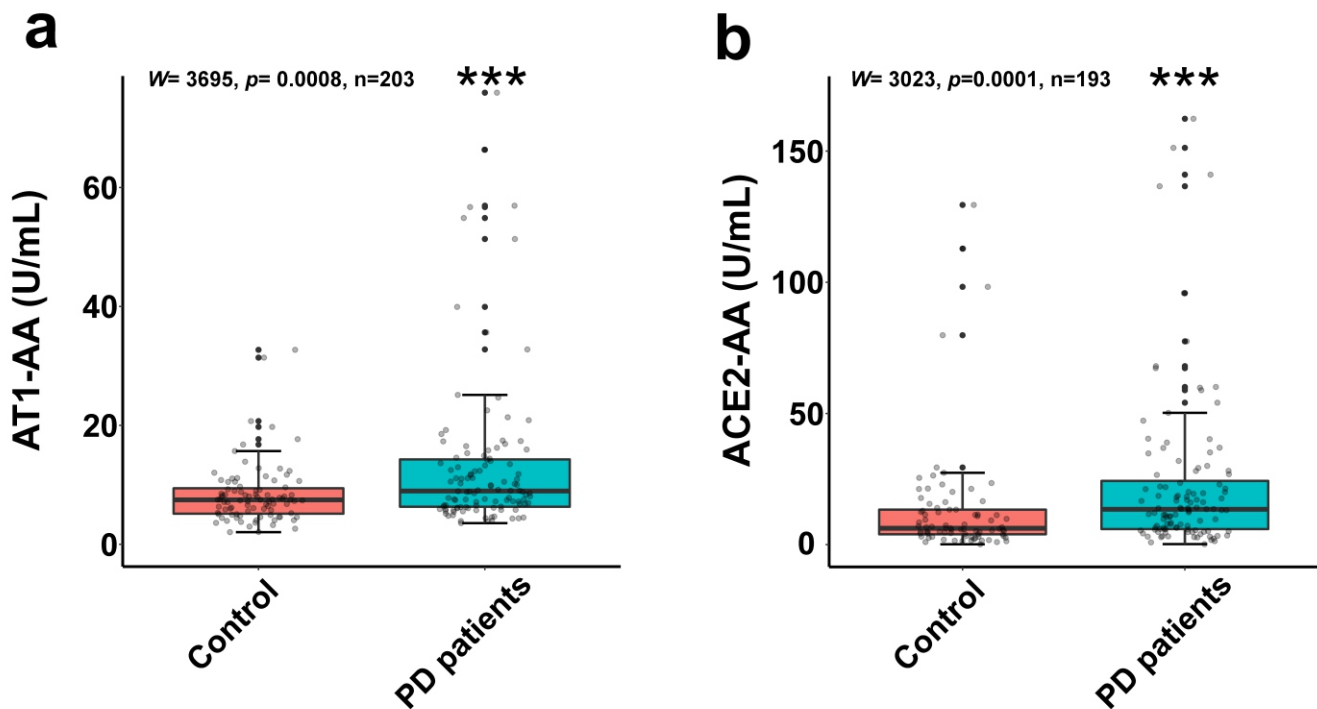

## Analysis excluding controls and patients under ACEIs or ARAll treatment

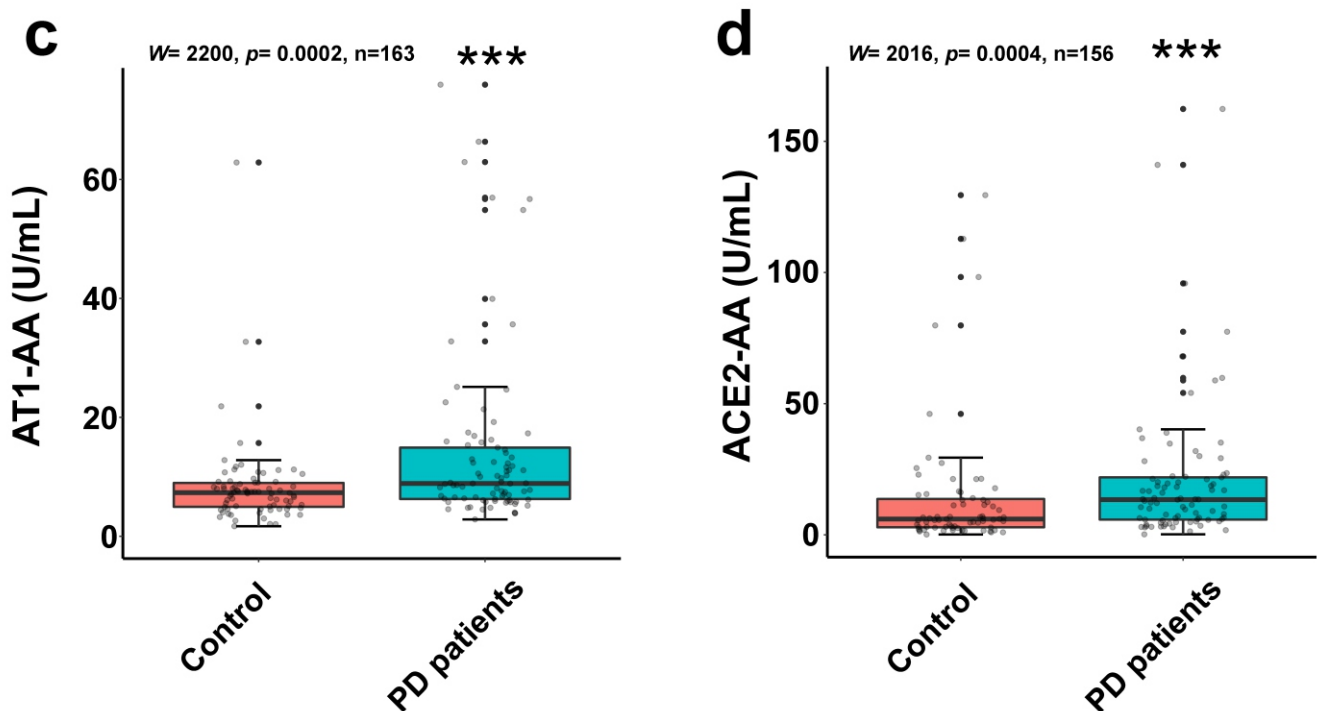

**Supplementary Figure 1. Autoantibody serum levels in controls and PD patients excluding those under immunosuppressive treatment (a, b) or ACEIs/ARAll (c, d). Parkinson's disease (PD) patients had significantly higher serum levels of AT1-AA (a, c) and ACE2-AA (b, d). Wilcoxon tests. Data distribution is shown using a box plot with boxes representing the IQR and the median (black line) and whiskers representing  $\pm 1.5$  IQR. IQR: Interquartile range; AT1-AA: Autoantibodies for AT1 receptors; ACE2-AA: ACE2 Autoantibodies.**

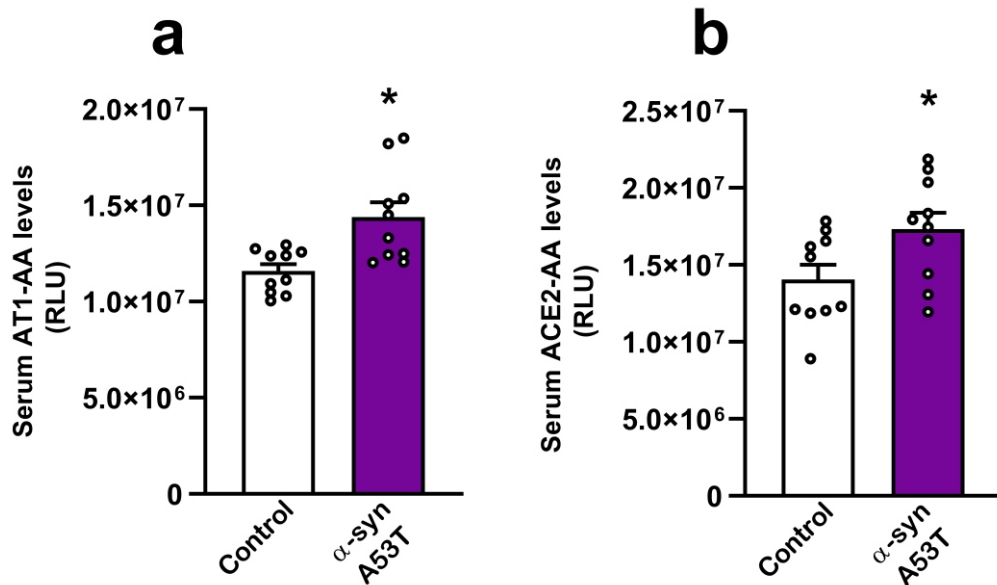

**Supplementary Figure 2. Increase in serum AT1-AA and ACE2-AA levels induced by dopaminergic degeneration in rats.** Serum levels of AT1-AA (a) and ACE2-AA (b) 4 weeks after injection of neurospecific adeno-associated viral vectors coding for a mutated form of human alpha-synuclein ( $\alpha$ -syn A53T). A significant increase in AT1-AA and ACE2-AA serum levels is observed in rats with dopaminergic lesions. Data are given as means  $\pm$  SEM. \* $P < 0.05$  compared to the control group. Student-t tests. AT1-AA: Autoantibodies for AT1 receptors; ACE2-AA: ACE2 Autoantibodies.

**Supplementary Table 1.** Main clinical features of the study subjects.

|                                       | Control<br>(n=106)   | Patients (n=117)     | Total (n=213)        | p-value      |
|---------------------------------------|----------------------|----------------------|----------------------|--------------|
| AT1-AA (U/mL)                         |                      |                      |                      |              |
| Mean (SD)                             | 8.922 (7.294)        | 13.505<br>(13.639)   | 11.326<br>(11.297)   | p=0.002 (1)  |
| Median                                | 7.556                | 8.923                | 8.034                |              |
| IQR                                   | 4.590                | 7.969                | 5.806                |              |
| Q1, Q3                                | 5.109, 9.699         | 6.271, 14.240        | 5.951, 11.757        |              |
| ACE2-AA (U/mL)                        |                      |                      |                      |              |
| Mean (SD)                             | 13.157<br>(21.300)   | 26.872<br>(50.527)   | 20.690<br>(40.583)   | p< 0.001 (2) |
| Median                                | 6.305                | 13.519               | 9.985                |              |
| IQR                                   | 10.084               | 20.602               | 15.304               |              |
| Q1, Q3                                | 3.265, 13.349        | 5.974, 26.576        | 4.800, 20.104        |              |
| AGE (years)                           |                      |                      |                      |              |
| Mean (SD)                             | 64.901 (9.249)       | 69.430<br>(10.095)   | 67.288 (9.944)       | p< 0.001 (3) |
| Median                                | 64.692               | 70.056               | 67.311               |              |
| IQR                                   | 10.561               | 14.039               | 12.919               |              |
| Q1, Q3                                | 59.286, 69.847       | 63.078, 77.117       | 61.074, 73.992       |              |
| GENDER                                |                      |                      |                      |              |
| Man                                   | 51 (48.1%)           | 57 (48.7%)           | 108 (48.4%)          | p=0.928 (4)  |
| Woman                                 | 55 (51.9%)           | 60 (51.3%)           | 115 (51.6%)          |              |
| HYPERTENSION                          |                      |                      |                      |              |
| No                                    | 70 (66.7%)           | 64 (54.7%)           | 134 (60.4%)          | p=0.069 (4)  |
| Yes                                   | 35 (33.3%)           | 53 (45.3%)           | 88 (39.6%)           |              |
| HEART DISEASE                         |                      |                      |                      |              |
| No                                    | 84 (81.6%)           | 93 (80.2%)           | 177 (80.8%)          | p=0.796 (4)  |
| Yes                                   | 19 (18.4%)           | 23 (19.8%)           | 42 (19.2%)           |              |
| DIABETES                              |                      |                      |                      |              |
| No                                    | 79 (75.2%)           | 94 (80.3%)           | 173 (77.9%)          | p=0.360 (4)  |
| Yes                                   | 26 (24.8%)           | 23 (19.7%)           | 49 (22.1%)           |              |
| OBESITY                               |                      |                      |                      |              |
| No                                    | 42 (40.0%)           | 51 (43.6%)           | 93 (41.9%)           | p=0.588 (4)  |
| Yes                                   | 63 (60.0%)           | 66 (56.4%)           | 129 (58.1%)          |              |
| 27-Hydroxycholesterol (27-OHC; ng/mL) |                      |                      |                      |              |
| Mean (SD)                             | 436.658<br>(208.822) | 498.724<br>(312.173) | 469.684<br>(270.009) | p=0.323 (1)  |
| Median                                | 397.320              | 413.299              | 407.360              |              |
| IQR                                   | 259.707              | 304.755              | 277.595              |              |
| Q1, Q3                                | 274.495,<br>534.202  | 305.888,<br>610.642  | 282.580,<br>560.175  |              |
| IL-6 (pg/mL)                          |                      |                      |                      |              |
| Mean (SD)                             | 1.029 (1.120)        | 1.224 (1.473)        | 1.133 (1.320)        | p=0.262 (1)  |
| Median                                | 0.670                | 0.825                | 0.760                |              |
| IQR                                   | 0.890                | 1.138                | 1.005                |              |
| Q1, Q3                                | 0.343, 1.232         | 0.382, 1.520         | 0.352, 1.357         |              |
| IL-17 (pg/mL)                         |                      |                      |                      |              |
| Mean (SD)                             | 11.016<br>(17.354)   | 11.849<br>(17.880)   | 11.461<br>(17.601)   | p=0.429 (1)  |

|                                                                                                                                                                                                                                                                                                                                                                                                                                                                                      |                        |                        |                        |             |
|--------------------------------------------------------------------------------------------------------------------------------------------------------------------------------------------------------------------------------------------------------------------------------------------------------------------------------------------------------------------------------------------------------------------------------------------------------------------------------------|------------------------|------------------------|------------------------|-------------|
| Median                                                                                                                                                                                                                                                                                                                                                                                                                                                                               | 3.970                  | 5.155                  | 4.530                  |             |
| IQR                                                                                                                                                                                                                                                                                                                                                                                                                                                                                  | 12.560                 | 15.538                 | 13.810                 |             |
| Q1, Q3                                                                                                                                                                                                                                                                                                                                                                                                                                                                               | 0.230, 12.790          | 0.230, 15.768          | 0.230, 14.040          |             |
| TNF- $\alpha$ (pg/mL)                                                                                                                                                                                                                                                                                                                                                                                                                                                                |                        |                        |                        |             |
| Mean (SD)                                                                                                                                                                                                                                                                                                                                                                                                                                                                            | 0.637 (0.777)          | 0.787 (1.367)          | 0.717 (1.130)          | p=0.880 (1) |
| Median                                                                                                                                                                                                                                                                                                                                                                                                                                                                               | 0.310                  | 0.310                  | 0.310                  |             |
| IQR                                                                                                                                                                                                                                                                                                                                                                                                                                                                                  | 0.450                  | 0.317                  | 0.382                  |             |
| Q1, Q3                                                                                                                                                                                                                                                                                                                                                                                                                                                                               | 0.310, 0.760           | 0.310, 0.627           | 0.310, 0.692           |             |
| LIGHT (pg/mL)                                                                                                                                                                                                                                                                                                                                                                                                                                                                        |                        |                        |                        |             |
| Mean (SD)                                                                                                                                                                                                                                                                                                                                                                                                                                                                            | 1199.294<br>(1262.424) | 1075.585<br>(1217.903) | 1133.467<br>(1237.610) | p=0.391 (1) |
| Median                                                                                                                                                                                                                                                                                                                                                                                                                                                                               | 710.760                | 541.960                | 629.575                |             |
| IQR                                                                                                                                                                                                                                                                                                                                                                                                                                                                                  | 2040.345               | 1709.242               | 1874.798               |             |
| Q1, Q3                                                                                                                                                                                                                                                                                                                                                                                                                                                                               | 134.395,<br>2174.740   | 68.683,<br>1777.925    | 100.665,<br>1975.463   |             |
| WEIGHT (Kg)                                                                                                                                                                                                                                                                                                                                                                                                                                                                          |                        |                        |                        |             |
| Mean (SD)                                                                                                                                                                                                                                                                                                                                                                                                                                                                            | 78.027<br>(14.432)     | 74.785<br>(13.965)     | 76.318<br>(14.248)     | p=0.092 (5) |
| Median                                                                                                                                                                                                                                                                                                                                                                                                                                                                               | 79.500                 | 73.200                 | 74.750                 |             |
| IQR                                                                                                                                                                                                                                                                                                                                                                                                                                                                                  | 22.250                 | 19.000                 | 18.625                 |             |
| Q1, Q3                                                                                                                                                                                                                                                                                                                                                                                                                                                                               | 67.000, 89.250         | 65.000, 84.000         | 66.375, 85.000         |             |
| <p>ACE2-AA: ACE2 autoantibodies; ACEi: Angiotensin converting enzyme inhibitors; AT1-AA: Autoantibodies for AT1 receptors; IQR: Interquartile range; SD: Standard deviation. (1) Wilcoxon rank sum test with continuity correction, Anderson Darling, (AD) test= 0; (2) Wilcoxon rank sum exact test, AD test= 0; (3) Two Sample t-test, AD test= 0.216, Fligner-Killeen (FK) test= 0.444; (4) Pearson's Chi-squared test; (5) Two Sample t-test, AD test= 0.843, FK test= 0.149</p> |                        |                        |                        |             |

**Supplementary Table 2.** Main clinical features of the study subjects. Baseline characteristics of the PD patients.

|                                    | TOTAL PD        | GENDER                |                         |
|------------------------------------|-----------------|-----------------------|-------------------------|
|                                    |                 | Males<br>n=57 (48.7%) | Females<br>n=60 (51.3%) |
| <b>Age (years)</b>                 |                 |                       |                         |
| Mean (SD)                          | 69.430 (10.095) | 67.60 (11.281)        | 71.17 (8.559)           |
| Median                             | 70.06           | 68.62                 | 71.04                   |
| IQR                                | 14.33           | 13.93                 | 11.99                   |
| Q1, Q3                             | 63.06, 77.39    | 61.00, 74.93          | 66.02, 78.01            |
| <b>Duration of disease (years)</b> |                 |                       |                         |
| Mean (SD)                          | 7.050 (5.181)   | 6.312 (3.833)         | 7.751 (6.149)           |
| Median                             | 6               | 5.714                 | 7                       |
| IQR                                | 6.649           | 4.938                 | 8.102                   |
| Q1, Q3                             | 9.649, 3.00     | 3.327, 8.265          | 2.680, 10.782           |
| <b>Hoehn-Yahr scale</b>            |                 |                       |                         |
| Mean (SD)                          | 2.308 (0.715)   | 2.202 (0.660)         | 2.408 (0.756)           |
| Median                             | 2               | 2                     | 2                       |
| <b>UPDRS3 ON</b>                   |                 |                       |                         |
| Mean (SD)                          | 27.24 (12.74)   | 27.510 (13.5648)      | 26.980 (11.993)         |
| Median                             | 26              | 27                    | 26                      |
| IQR                                | 18.75           | 19.50                 | 18                      |
| Q1, Q3                             | 17.75, 36.50    | 17.50, 37.00          | 18.50, 36.50            |
| <b>UPDRS3 OFF</b>                  |                 |                       |                         |
| Mean (SD)                          | 39.662 (16.133) | 39.088 (15.272)       | 40.235 (17.162)         |
| Median                             | 37              | 37                    | 40.50                   |
| IQR                                | 21.25           | 16.80                 | 26.75                   |
| Q1, Q3                             | 28.25, 49.75    | 29.75, 46.50          | 26.00, 52.75            |
| <b>Cognitive impairment (%):</b>   |                 |                       |                         |
| No                                 | 68 (58.1%)      | 34 (59.6%)            | 34 (56.7%)              |
| Mild                               | 32 (27.4%)      | 13 (22.8%)            | 19 (31.7%)              |
| Yes                                | 17 (14.5%)      | 10 (17.5%)            | 7 (11.7%)               |
| <b>MMSE score</b>                  |                 |                       |                         |
| Mean (SD)                          | 25.37 (4.989)   | 25.75 (4.814)         | 25.02 (5.165)           |
| Median                             | 27              | 27                    | 27                      |
| IQR                                | 3               | 2.75                  | 4.5                     |
| Q1, Q3                             | 25, 28          | 25.25, 28.00          | 23.50, 28.00            |
| <b>MoCA score</b>                  |                 |                       |                         |
| Mean (SD)                          | 21.93 (5.495)   | 22.05 (5.539)         | 21.80 (5.499)           |
| Median                             | 23              | 23                    | 23                      |
| IQR                                | 7               | 7                     | 7                       |
| Q1, Q3                             | 19.00, 26.00    | 19.00, 26.00          | 19.00, 26.00            |
| <b>MoCA scalar score* (0-18)</b>   |                 |                       |                         |
| Mean (SD)                          | 9.96 (3.018)    | 9.87 (2.913)          | 10.06 (3.147)           |
| Median                             | 10              | 10                    | 10                      |
| IQR                                | 4               | 3                     | 4                       |
| Q1, Q3                             | 8.00, 12.00     | 8.00, 11.00           | 8.00, 12.00             |

|                                                                                                                                                                                                                                                                                                                                                                                                                                                          |                |                  |                   |
|----------------------------------------------------------------------------------------------------------------------------------------------------------------------------------------------------------------------------------------------------------------------------------------------------------------------------------------------------------------------------------------------------------------------------------------------------------|----------------|------------------|-------------------|
| <b>Number of antiparkinsonian medications</b>                                                                                                                                                                                                                                                                                                                                                                                                            |                |                  |                   |
| Mean (SD)                                                                                                                                                                                                                                                                                                                                                                                                                                                | 2.59 (1.339)   | 2.66 (1.325)     | 2.52 (1.359)      |
| Median                                                                                                                                                                                                                                                                                                                                                                                                                                                   | 2              | 3                | 2                 |
| IQR                                                                                                                                                                                                                                                                                                                                                                                                                                                      | 1.75           | 2                | 1                 |
| Q1, Q3                                                                                                                                                                                                                                                                                                                                                                                                                                                   | 2, 3.75        | 2, 4             | 2, 3              |
| <b>Levodopa equivalent daily dose (mg)</b>                                                                                                                                                                                                                                                                                                                                                                                                               |                |                  |                   |
| Mean (SD)                                                                                                                                                                                                                                                                                                                                                                                                                                                | 706 (415.720)  | 744.132(453.010) | 669.391 (377.182) |
| Median                                                                                                                                                                                                                                                                                                                                                                                                                                                   | 710            | 756              | 650               |
| IQR                                                                                                                                                                                                                                                                                                                                                                                                                                                      | 608            | 595              | 647.50            |
| Q1, Q3                                                                                                                                                                                                                                                                                                                                                                                                                                                   | 387, 995       | 400.00, 995.00   | 343.75, 991.25    |
| <b>Use of dopamine agonists (%)</b>                                                                                                                                                                                                                                                                                                                                                                                                                      | 59 (50.9%)     | 28 (50%)         | 31 (51.7%)        |
| <b>Motor fluctuations (%)</b>                                                                                                                                                                                                                                                                                                                                                                                                                            | 72 (62.1%)     | 36 (63.2%)       | 36 (61.0%)        |
| <b>NMSS score</b>                                                                                                                                                                                                                                                                                                                                                                                                                                        |                |                  |                   |
| Mean (SD)                                                                                                                                                                                                                                                                                                                                                                                                                                                | 69.391 (41.89) | 65.070 (38.875)  | 73.638 (44.599)   |
| Median                                                                                                                                                                                                                                                                                                                                                                                                                                                   | 62             | 59               | 67                |
| IQR                                                                                                                                                                                                                                                                                                                                                                                                                                                      | 59             | 38               | 69.75             |
| Q1, Q3                                                                                                                                                                                                                                                                                                                                                                                                                                                   | 37.00, 96.00   | 38.50, 76.50     | 36.50, 106.25     |
| Baseline characteristics of the PD patients. No significant differences were detected between males and females. UPDRS: Unified Parkinson Disease Rating Scale; MMSE: Mini-Mental State Examination; MoCA: Montreal Cognitive Assessment; NMSS: Non-Motor Symptoms Scale. *adjusted by age and level of education for Spanish population (10-18: no cognitive impairment; 7-9: mild cognitive impairment; <7: cognitive impairment) (Ojeda et al, 2016). |                |                  |                   |

Ojeda, N., Del Pino, R., Ibarretxe-Bilbao, N., Schretlen, D. J., & Pena, J. (2016). Test de evaluacion cognitiva de Montreal: normalizacion y estandarizacion de la prueba en poblacion española [Montreal Cognitive Assessment Test: normalization and standardization for Spanish population]. *Revista de neurologia*, 63(11), 488–496
